# Supplementary material
Source: MDPI journal article supplement (https://www.mdpi.com/2073-4395/13/6/1619)
Supplement: s1 [file s1]

1) 20-A7-1.M19 ----- BIM F-795 G (Belarusian collection of non-pathogenic microorganisms)

2) 20-A7-1.M29 ----- BIM F-796 G (Belarusian collection of non-pathogenic microorganisms)

As the object of study served isolated from the foci of mold lesions fungal strains of genus *Phoma* that arose under extreme conditions of East Antarctica on samples of anthropogenic materials delivered from the construction site of the Belarusian Antarctic Station collected during 7th Belarusian Antarctic Expedition (2014-2015), in the places where scientific expedition team worked (Russia: East Antarctica, Enderby Land, oasis Mount Vechernyaya).

#### DNA- Sequences

20-A7-1.M19 internal transcribed spacer 1

```
GAGGAAGTAAAAGTCGTAACAAGGTTTCCGTAGGTGAACCTGCGGAAGGATCATTA
CCTAGAGTTTGTGGGCTTTGCCTGCTATCTCTTACCCATGTCTTTTGAGTACTTACGT
TTCTTCGGTGGGTTTCGCCCCGCCGATTGGACAATTTAAACCCTTTGCAGTTGCAATCA
GCGTCTGAAAAACATAATAGTTACAACCTTTCAACAACGGATCTCTTGTTTCTGGCAT
CGATGAAGAACGCAGCGAAATGCGATAAGTAGTGTGAATTGCAGAATTCAGTGAAT
CATCGAATCTTTGAACGCACATTGCGCCCCTTGGTATTCCATGGGGCATGCCTGTTT
GAGCGTCATTTGTACCTTCAAGCATTGCTTGGTGTGTTGGGTGTTTGTCTCGCCTTTGCG
TGTAGACTCGCCTTAAACAATTGGCAGCCGGCGTATTGATTTTCGGAGCGCAGTACA
TCTCGCGCTTTGCACTCATAACGACGACGTCCAAAAGTACATTTTAACACTCTGACC
TCGATCAGGTA
```

20-A7-1.M29 internal transcribed spacer 1

```
TTCTTGGTCCATTTAGAGGAAGTAAAAGTCGTAACAAGGTTTCCGTAGGTGAACCTG
CGGAAGGATCATTACCTAGAGTTTGTGGGCTTTGCCTGCTATCTCTTACCCATGTCTT
TTGAGTACTTACGTTTCTTCGGTGGGTTCGCCCCGCCGATTGGACAATTTAAACCCTTT
GCAGTTGCAATCAGCGTCTGAAAAACATAATAGTTACAACCTTTCAACAACGGATCTC
TTGGTTTCTGGCATCGATGAAGAACGCAGCGAAATGCGATAAGTAGTGTGAATTGCA
GAATTCAGTGAATCATCGAATCTTTGAACGCACATTGCGCCCCTTGGTATTCCATGG
GGCATGCCTGTTTCGAGCGTCATTTGTACCTTCAAGCATTGCTTGGTGTGTTGGGTGTTT
TCTCGCCTTTGCGTGTAGACTCGCCTTAAACAATTGGCAGCCGGCGTATTGATTTT
GGAGCGCAGTACATCTCGCGCTTTGCACTCATAACGACGACGTCCAAAAGTACATTT
TAACACTCTGACCTCGGATCAGGTAGGGATACCCA
```

20-A7-1.M19 *tef* translation elongation factor 1-alpha (*tef1*) gene, partial cds

```
TCATCGAGAAGTTCGAGAAGGTACGTAACATTTTTTTTTTCCCTCTGAGCCAACACC
ACACGCTTTTGCAGTCTTTGAACGAGTCGCCTCTTTCTGGGCTTATCGTTCATTGAGG
GGCATTTTTTGGTGGGGTTGTGCGAGCTTTTCGCGCGCGCACGCTAGTGCGTTTGGGG
CGCTCGCCAACCTTCAACACCATGCCCCACATTACTTTTTTGCATCGCGAGCTTTTGGCC
TTTTTGGTTCGATGGCTACAACATCTTTTCGCCATATCATCTTCAGTTTCATAATACTGA
TACCACCGCCTACAAATATTCTGACAACGTCACAGGGAGCCGCCGAACCTCGGAAAG
GGTCCCTTCAAGAA
```

20-A7-1.M29 *tef* translation elongation factor 1-alpha (*tef1*) gene, partial cds

```
TCATCGAGAAGTTCGAGAAGGTACGTAACATTTTTTTTTTCCCTCTGAGCCAACACC
ACACGCTTTTGCAGTCTTTGAACGAGTCGCCTCTTTCTGGGCTTATCGTTCATTGAGG
GGCATTTTTTGGTGGGGTTGTGCGAGCTTTTCGCGCGCGCACGCTAGTGCGTTTGGGG
CGCTCGCCAACCTTCAACACCATGCCCCACATTACTTTTTTGCATCGCGAGCTTTTGGCC
```

TTTTTGGTCGATGGCTACAACATCTTTCGCCATATCATCTTCAGTTTCATAATACTGA  
TACCACCGCCTACAAATATTCTGACAACGTCACAGGAAGCCGCCGAACCTCGGCAAG  
GGTTCCTTCAAGAA

20-A7-1.M19 beta-tubulin (tub2) gene, partial cds

TGTGCACCTCCAAACCGGTCAATGCGTAAGTACATCACTACATCCTTTTTGTACCGA  
TAGCAGCTTACAATCGGCAGGGTAACCAAATCGGTGCCGCCTTCTGGCAGACCATCT  
CCGGCGAGCATGGCCTCGACGGCTCCGGTGTCTACAATGGCACCTCGGATCTCCAGC  
TTGAGCGCATGAACGTCTACTTCAACGAGGTACGAGAAATGGCACACTCTACTTCGA  
CGGACTGCGAGTGCTGACCTTTTGTAGGCTTCCGGCAACAAGTTCGTTCCCCGTGCC  
GTCCTCGTCGATTTGGAGCCTGGTACAATGGACGCTGTCCGCGCTGGCTAGCCAGCT  
CATGTCGTCT

20-A7-1.M29 beta-tubulin (tub2) gene, partial cds

CGTAAGTACATCACTACATCCTTTTTGTACCGATAGCAGCTTACAATCGGCAGGGTA  
ACCAAATCGGTGCCGCCTTCTGGCAGACCATCTCCGGCGAGCATGGCCTCGACGGCT  
CCGGTGTCTACAATGGCACCTCGGATCTCCAGCTTGAGCGCATGAACGTCTACTTCA  
ACGAGGTACGAGAAATGGCACACTCTACTTCGACGGACTGCGAGTGCTGACCTTTTG  
TAGGCTTCCGGCAACAAGTTCGTTCCCCGTGCCGTCCTCGTCGATTTGGAGCCTGGT  
ACAATGGACGCTGTCCGCGCTGGC

Table S1. Reference Sequences

| Strain/isolate                                    | Locus                             |                                         |              |
|---------------------------------------------------|-----------------------------------|-----------------------------------------|--------------|
|                                                   | internal<br>transcribed<br>spacer | translational<br>elongation<br>factor 1 | beta-tubulin |
| <i>Paraphoma<br/>fimeti</i><br>UTHSC:DI16-<br>296 | LT796872.1                        | LT797112.1                              | LT796952.1   |
| <i>Phoma<br/>herbarum</i><br>CBS 615.75           | KF251212.1                        | KF253168.1                              | KF252703.1   |
| <i>Phoma exigua</i><br>strain CBS<br>101211       | GU237722.1                        | KY484711.1                              | GU237507.1   |

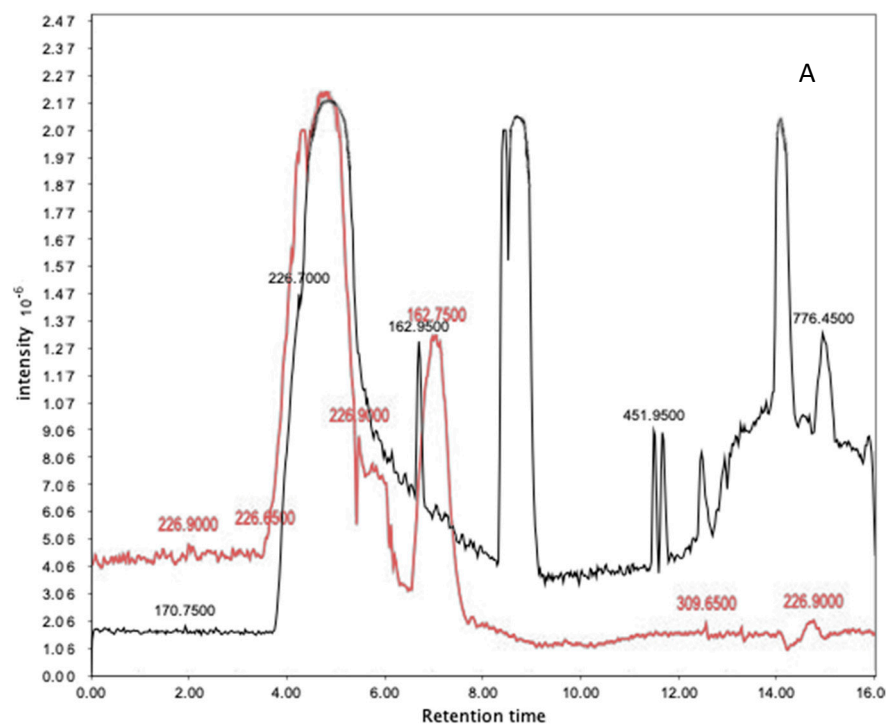

1ver0-M19 MS\_DAD\_002.mzML

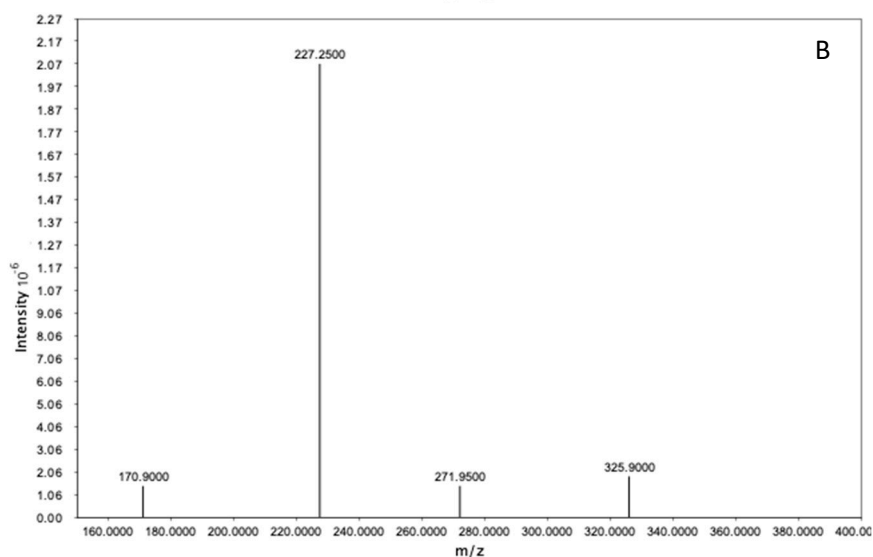

Scan #193

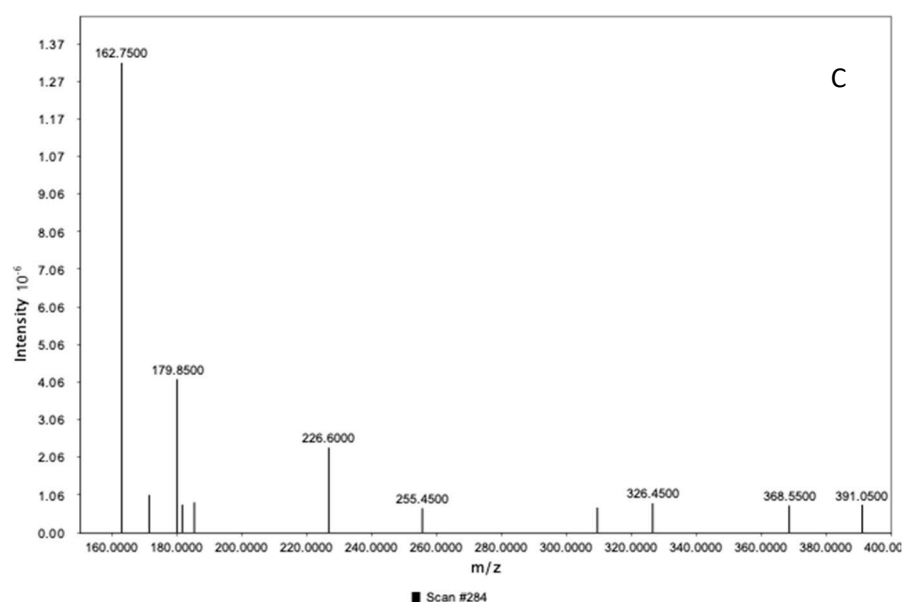

Figure S1. High performance liquid chromatography–mass spectrometry analysis of *Phoma herbarum*. (A) Chromatogram of crude mycelium extract (CME) of the strains M19 (black) and M29 (brown); (B) MS spectrum RT=4.93; (C) MS spectrum RT=7.07. HPLC analysis was performed on C18 5  $\mu$ m column (4.6  $\times$  250 mm) using a mobile phase of gradient acidified water (0.1% trifluoroacetic acid) mixture of acetonitrile and with a flow rate of 0.6 mL/min. The gradient started with 100% acidified water for 3 min, and then increased linearly to 100% acetonitrile with 0.1% (v:v) trifluoroacetic acid at a flow rate of 1 ml/min and absorbance was monitored at 227 nm. The injection volume of each extract or standard solution was 5  $\mu$ L.

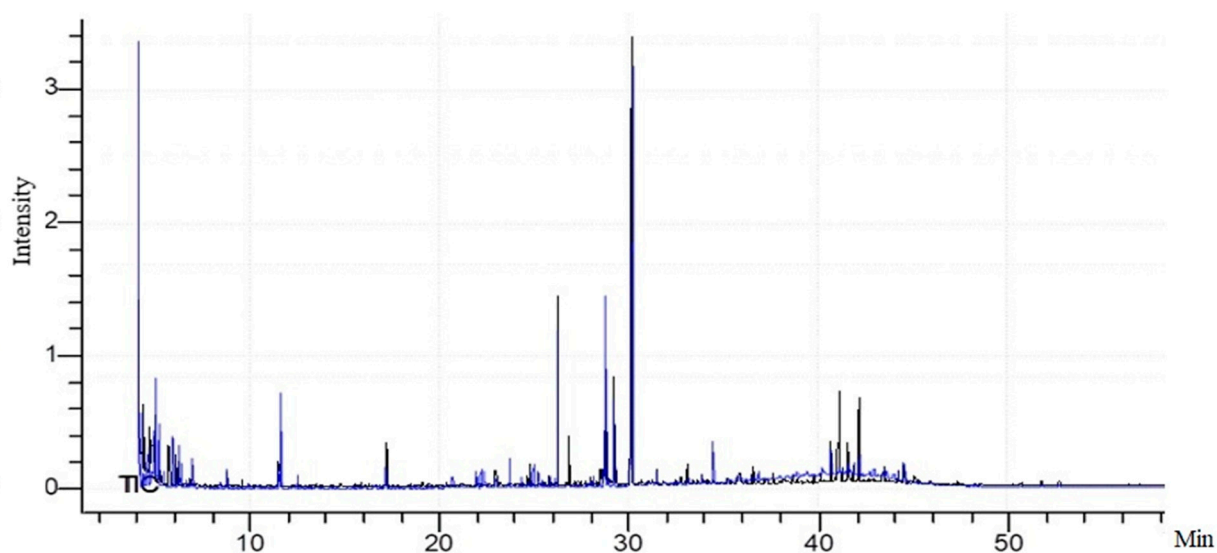

(A)

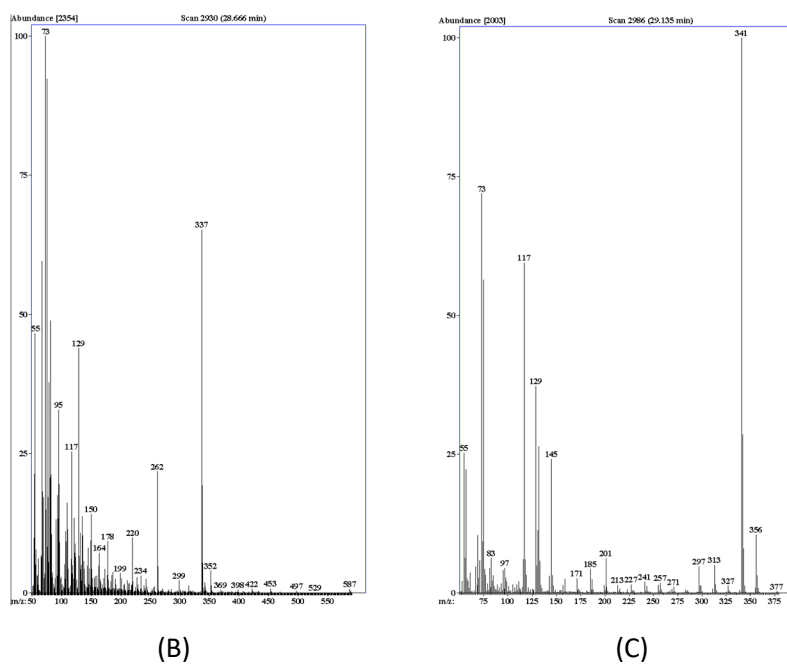

Figure S2. Gas chromatography–mass spectrometry (GC-MS) analysis of *Phoma herbarum*. (A) Gas chromatogram of crude mycelium extract (CME) of the M19 (B) and M29 (C) strains. (B) MS spectrum RT=...; (C) MS spectrum RT=....
